# Supplementary material for: Palmitic‐Acid‐Based Hydrophobic Deep Eutectic Solvents for the Extraction of Lower Alcohols from Aqueous Media: Liquid–Liquid Equilibria Measurements, Validation and Process Economics
Source: PubMed Central journal article supplement (PMC6827721; doi:10.1002/gch2.201900024), 2019-07-26
Supplement: GCH2-3-1900024-s001.pdf [file GCH2-3-1900024-s001.pdf]

# Global Challenges

---

Open Access

## Supporting Information

for *Global Challenges*, DOI: 10.1002/gch2.201900024

**Palmitic-Acid-Based Hydrophobic Deep Eutectic Solvents  
for the Extraction of Lower Alcohols from Aqueous Media:  
Liquid–Liquid Equilibria Measurements, Validation and  
Process Economics**

*Rupesh Verma and Tamal Banerjee\**

## **Supplementary Information**

### **Palmitic Acid based Deep Eutectic Solvent for the Extraction of Lower Alcohols from Aqueous Media : Liquid Liquid Equilibria Measurements, Validation and Process Economics**

Rupesh Verma and Tamal Banerjee\*

Department of Chemical Engineering, Indian Institute of Technology Guwahati, Guwahati, Assam-781039, India

\*Corresponding author:

E-mail address: tamalb@iitg.ac.in (Prof. T. Banerjee)

Tel.: +91-361-2582266; fax: +91-361-2582291

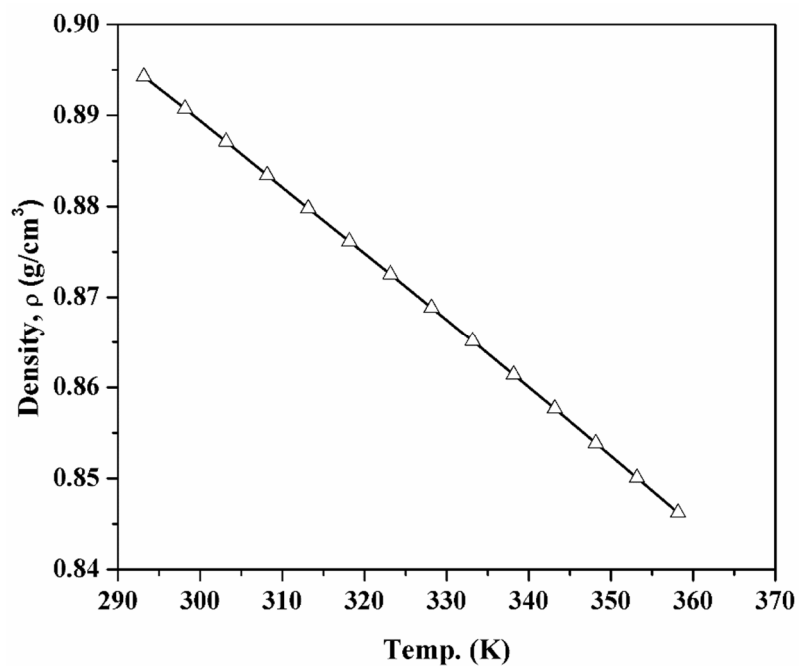

**Figure S1.** Density of of DL-menthol and Palmitic acid (12:1) based DES at different temperatures

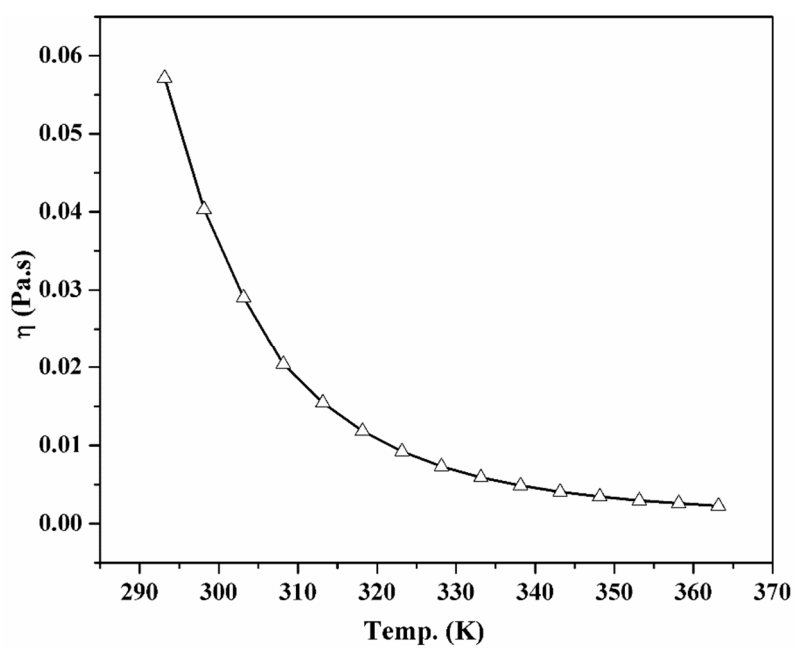

**Figure S2.** Viscosity of of DL-menthol and Palmitic acid (12:1) based DES at different temperatures

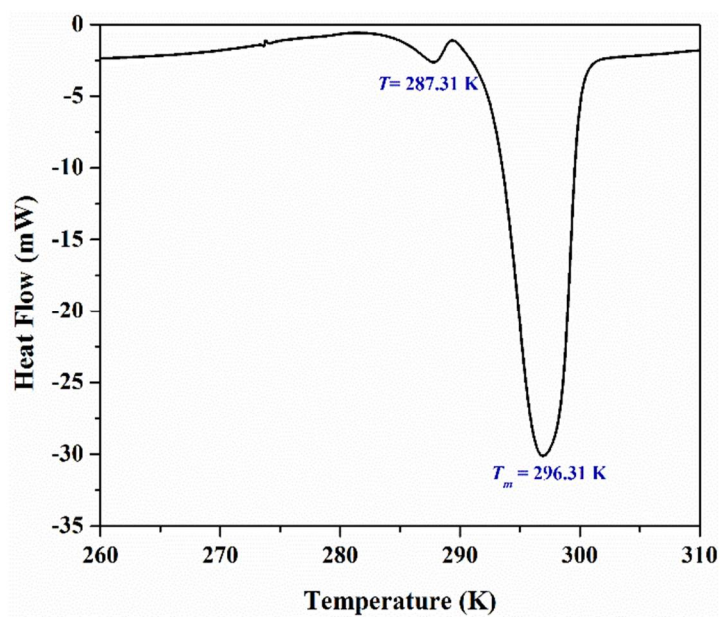

**Figure S3.** Differential Scanning Calorimetry (DSC) of DL-menthol and Palmitic acid (12:1) based DES

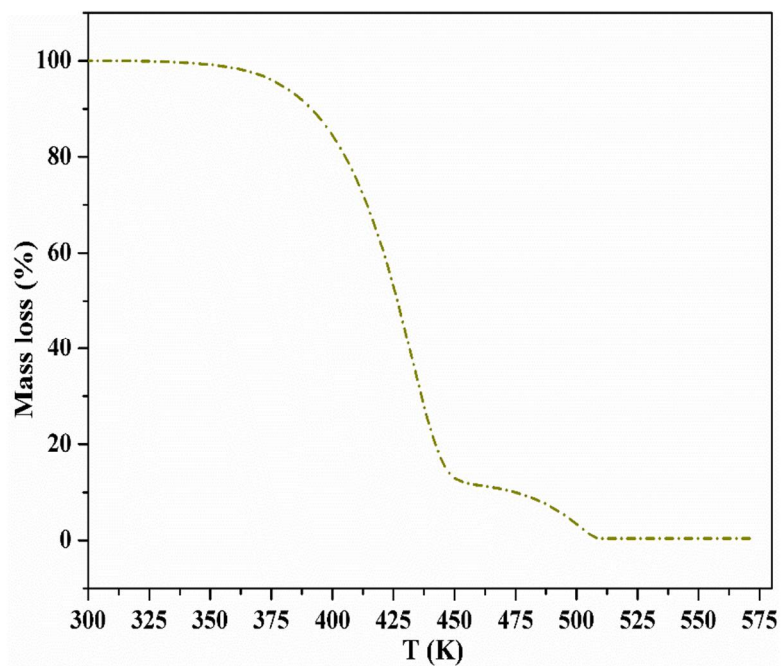

**Figure S4.** ThermoGravimetric Analysis (TGA) for DL-menthol and Palmitic acid (12:1) based DES

**Table S1.** Thermal properties of studied eutectic mixtures: Decomposition temperature ( $T_{\text{deg}}$ ) and normal melting temperature ( $T_{\text{m}}$ ).

| Compound Name                       | $T_{\text{m}}$ (K) | $T_{\text{deg}}$ (K) |
|-------------------------------------|--------------------|----------------------|
| <b>Pure compounds</b>               |                    |                      |
| DL-menthol                          | 307.15-309.15      | 309.15               |
| Palmitic acid or Hexadecanoic acid  | 335.15-339.15      | 339.15               |
| <b>Eutectic Mixture</b>             |                    |                      |
| DES (DL-menthol:Palmitic acid) 12:1 | 296.49             | 541.15               |

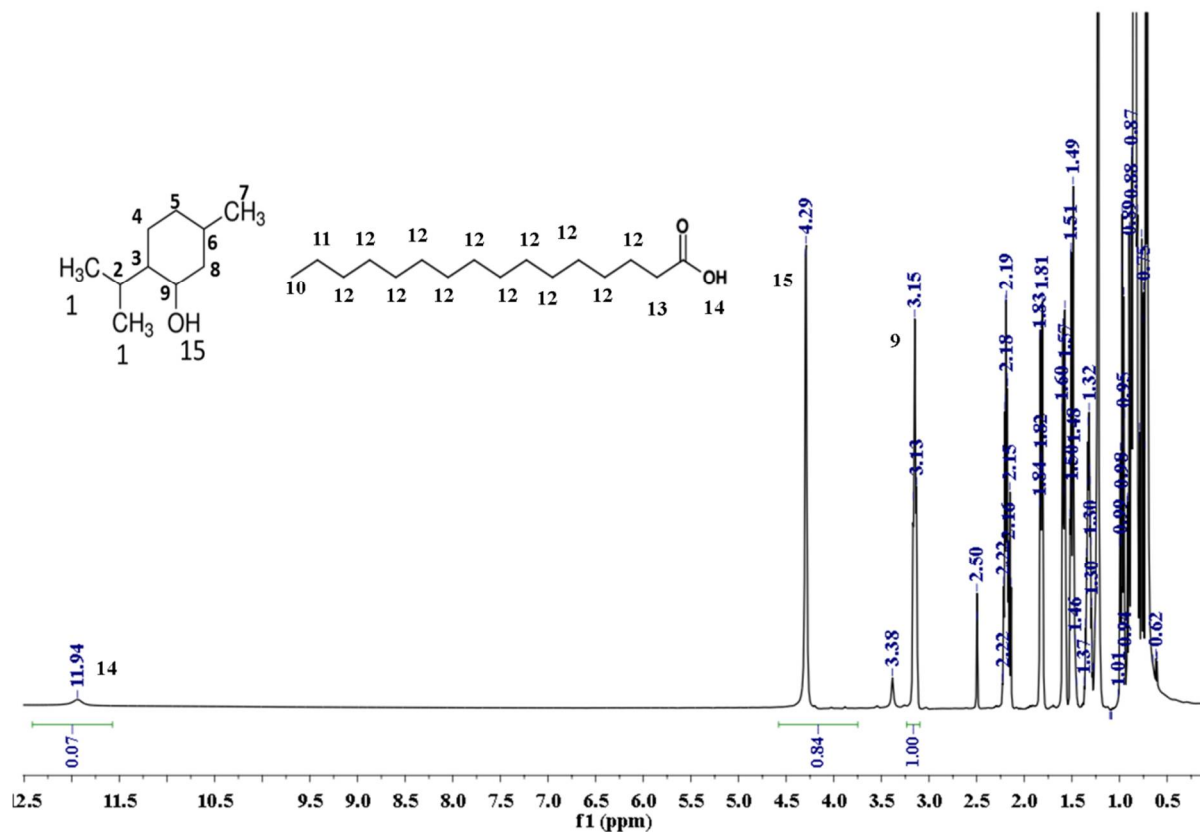

**Figure S5.**  $^1\text{H}$  NMR Spectra of Synthesized DL-menthol and palmitic acid based DES

Algebraic Procedure for Computing Mole Fraction in DES-1 from  $^1\text{H}$  NMR data

| Compound name | Corresponding peak   | Peak Position (PPM) * | Corresponding Area           | Area due to a single atom of H | Mole ratio |
|---------------|----------------------|-----------------------|------------------------------|--------------------------------|------------|
| DL-menthol    | -OH of DL-menthol    | 4.29                  | 0.84<br>(one Hydrogen atoms) | 0.84                           | 12         |
| Palmitic acid | -OH of Myristic acid | 11.94                 | 0.07<br>(one Hydrogen atoms) | 0.07                           | 1          |

\* As per Figure S-5

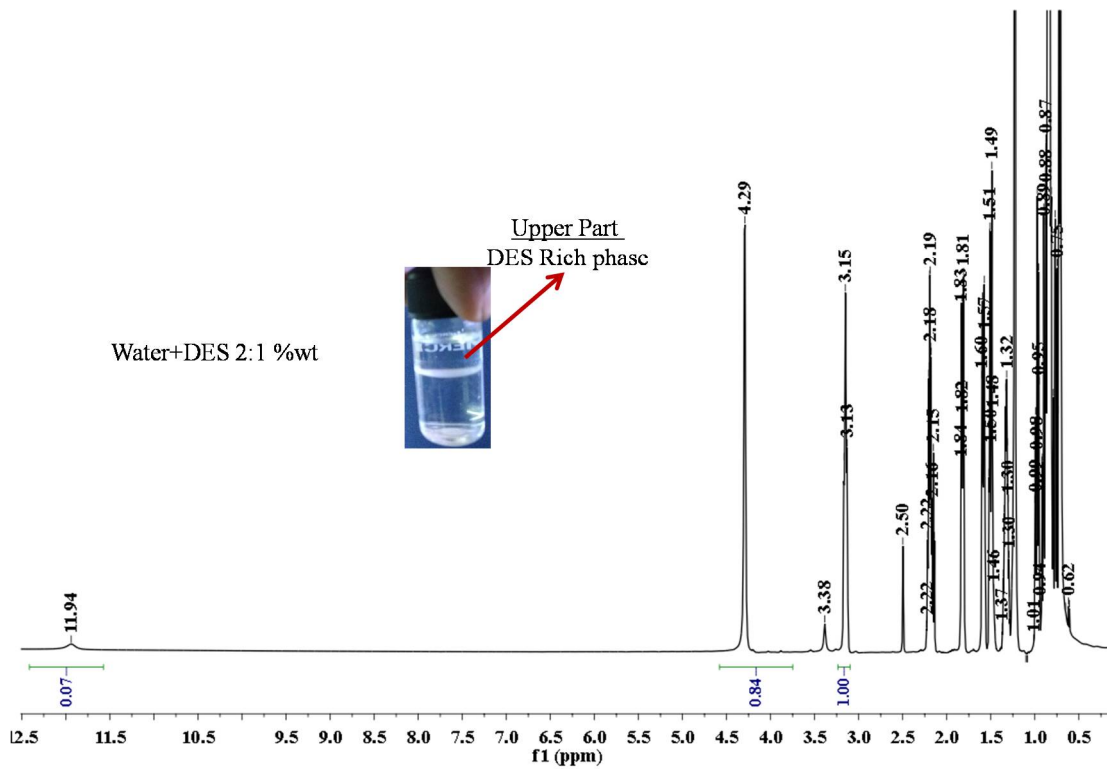

**Figure S6.**  $^1\text{H}$  NMR analysis of DES rich phase in water

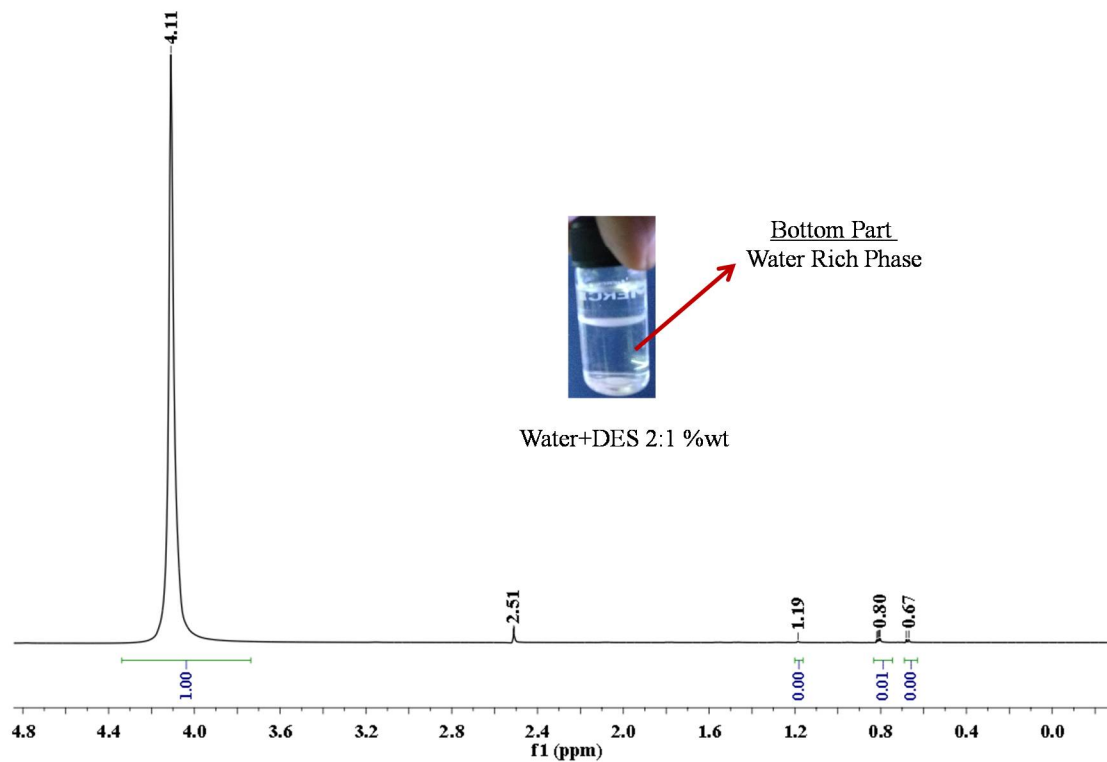

**Figure S7.**  $^1\text{H}$  NMR analysis of water rich phase
